# Supplementary material for: Phosphinic derivative of DTPA conjugated to a G5 PAMAM dendrimer: an17O and1H relaxation study of its Gd(iii) complex
Source: Royal Society of Chemistry journal article supplement (doi:10.1039/b517847a), 2006-01-01
Supplement: b517847a.pdf [file b517847a.pdf]

# Phosphinic derivative of DTPA conjugated to a G5 PAMAM dendrimer: an $^{17}\text{O}$ and $^1\text{H}$ relaxation study of its Gd(III) complex

Petra Lebdušková,<sup>ab</sup> Angélique Sour,<sup>b</sup> Lothar Helm,<sup>\*b</sup> Éva Tóth,<sup>bc</sup> Jan Kotek,<sup>a</sup> Ivan Lukeš<sup>\*a</sup> and André E. Merbach<sup>b</sup>

<sup>a</sup> Department of Inorganic Chemistry, Charles University, Hlavova 2030, 12840 Prague, Czech Republic. Fax: +420 2 2195 1253; Tel: +420 2 2195 1259; E-mail: lukes@natur.cuni.cz

<sup>b</sup> Institut des Sciences et Ingénierie Chimiques, Ecole Polytechnique Fédérale de Lausanne, CH-1015 Lausanne, Switzerland. Fax: +41 21 693 98 75; Tel: +41 21 693 98 76; E-mail: lothar.helm@epfl.ch

<sup>c</sup> Centre de physique moléculaire, CNRS, rue Charles-Sadron, 45071 Orléans, Cedex 2, France.

## Supplementary information

**Appendix.** Equations used in the analysis of  $^{17}\text{O}$  NMR and  $^1\text{H}$  NMRD data.

**Table S1.** Proton relaxivities ( $r_1 / \text{mM}^{-1}\text{s}^{-1}$ ) of G5-(Gd(DTTAP))<sub>63</sub>, c(Gd<sup>III</sup>)=5.3 mM, pH=6.25, at variable temperature.

**Table S2.** Proton relaxivities ( $r_1 / \text{mM}^{-1}\text{s}^{-1}$ ) of [Gd(DTTAP-bz-NH<sub>2</sub>)(H<sub>2</sub>O)]<sup>2-</sup>, c(Gd<sup>III</sup>)=4.2 mM, pH=6.75, at variable temperature.

**Table S3.** Proton relaxivities ( $r_1 / \text{mM}^{-1}\text{s}^{-1}$ ) of [Gd(DTTAP-bz-NO<sub>2</sub>)(H<sub>2</sub>O)]<sup>2-</sup>, c(Gd<sup>III</sup>)=3.8 mM, pH=6.59, at variable temperature.

**Table S4.** Variable temperature reduced transverse and longitudinal  $^{17}\text{O}$  relaxation rates of G5-(Gd(DTTAP))<sub>63</sub>, c(Gd<sup>III</sup>)=39 mM, pH=5.69,  $P_m=7.95 \cdot 10^{-4}$  at 9.4 T. Reference was G5-(Y(DTTAP))<sub>63</sub>, c(Y<sup>III</sup>)=34 mM, pH=5.83.

**Table S5.** Variable temperature reduced transverse and longitudinal  $^{17}\text{O}$  relaxation rates of G5-(Gd(DTTAP))<sub>63</sub>, c(Gd<sup>III</sup>)=39 mM, pH=5.69,  $P_m=7.95 \cdot 10^{-4}$  at 4.7 T. Reference was G5-(Y(DTTAP))<sub>63</sub>, c(Y<sup>III</sup>)=34 mM, pH=5.83.

**Table S6.** Variable temperature reduced transverse and longitudinal  $^{17}\text{O}$  relaxation rates of [Gd(DTTAP-bz-NH<sub>2</sub>)(H<sub>2</sub>O)]<sup>2-</sup>, c(Gd<sup>III</sup>)=46 mM, pH=5.51,  $P_m=8.19 \cdot 10^{-4}$  at 9.4 T. Reference was acidified H<sub>2</sub>O, pH=3.3.

**Table S7.** Variable temperature reduced transverse and longitudinal  $^{17}\text{O}$  relaxation rates of [Gd(DTTAP-bz-NO<sub>2</sub>)(H<sub>2</sub>O)]<sup>2-</sup>, c(Gd<sup>III</sup>)=32 mM, pH=5.91,  $P_m=5.73 \cdot 10^{-4}$  at 9.4 T. Reference was acidified H<sub>2</sub>O, pH=3.3.

**Table S8.** Calculation of the number of chelating groups per dendrimer.

**Figure S1.** Variable temperature reduced  $^{17}\text{O}$  chemical shifts of [Gd(DTTAP-bz-NO<sub>2</sub>)(H<sub>2</sub>O)]<sup>2-</sup>, c(Gd<sup>III</sup>)=32 mM, pH=5.91,  $P_m=5.73 \cdot 10^{-4}$  at 9.4 T. Reference was acidified H<sub>2</sub>O, pH=3.3.

**Figure S2.** Variable temperature reduced  $^{17}\text{O}$  chemical shifts of [Gd(DTTAP-bz-NH<sub>2</sub>)(H<sub>2</sub>O)]<sup>2-</sup>, c(Gd<sup>III</sup>)=46 mM, pH=5.51,  $P_m=8.19 \cdot 10^{-4}$  at 9.4 T. Reference was acidified H<sub>2</sub>O, pH=3.3.

**Figure S3.** Variable temperature reduced  $^{17}\text{O}$  chemical shifts of G5-(Gd(DTTAP))<sub>63</sub>, c(Gd<sup>III</sup>)=39 mM, pH=5.69,  $P_m=7.95 \cdot 10^{-4}$  at 4.7 T and 9.4 T. Reference was G5-(Y(DTTAP))<sub>63</sub>, c(Y<sup>III</sup>)=34 mM, pH=5.83.

**Table S9.** Fitted parameters of G5-(Gd(DTTAP))<sub>63</sub>.

**Table S10.** Fitted parameters of [Gd(DTTAP-bz-NO<sub>2</sub>)(H<sub>2</sub>O)]<sup>2-</sup> and [Gd(DTTAP-bz-NH<sub>2</sub>)(H<sub>2</sub>O)]<sup>2-</sup>. The underlined parameters were fixed during the fitting.

## Equations.

### <sup>17</sup>O NMR relaxation:

From the measured <sup>17</sup>O NMR relaxation rates and angular frequencies of the paramagnetic solutions,  $1/T_1$ ,  $1/T_2$  and  $\omega$ , and of the acidified water reference,  $1/T_{1A}$ ,  $1/T_{2A}$  and  $\omega_A$ , one can calculate the reduced relaxation rates,  $1/T_{1r}$ ,  $1/T_{2r}$  (Eq. [1] and [2]), where  $1/T_{1m}$ ,  $1/T_{2m}$  are the relaxation rates of the bound water and  $\Delta\omega_m$  is the chemical shift difference between bound and bulk water,  $\tau_m$  is the mean residence time or the inverse of the water exchange rate  $k_{ex}$  and  $P_m$  is the mole fraction of the bound water.<sup>1,2</sup>

$$\frac{1}{T_{1r}} = \frac{1}{P_m} \left[ \frac{1}{T_1} - \frac{1}{T_{1A}} \right] = \frac{1}{T_{1m} + \tau_m} + \frac{1}{T_{1OS}} \quad [1]$$

$$\frac{1}{T_{2r}} = \frac{1}{P_m} \left[ \frac{1}{T_2} - \frac{1}{T_{2A}} \right] = \frac{1}{\tau_m} \frac{T_{2m}^{-2} + \tau_m^{-1} T_{2m}^{-1} + \Delta\omega_m^2}{(\tau_m^{-1} + T_{2m}^{-1})^2 + \Delta\omega_m^2} + \frac{1}{T_{2OS}} \quad [2]$$

The terms  $1/T_{1OS}$  and  $1/T_{2OS}$  describe relaxation contributions from water molecules not directly bound to the paramagnetic centre. In previous studies it has been shown that <sup>17</sup>O outer sphere relaxation terms due to water molecules freely diffusing on the surface of Gd-polyaminocarboxylate complexes are negligible. For complexes with phosphate groups relaxation terms due to 2<sup>nd</sup> sphere water molecules can however be important for longitudinal relaxation  $1/T_{1r}$  and have therefore to be included.

$$\frac{1}{T_{1r}} = \frac{1}{T_{1r}^{1st}} + \frac{1}{T_{1r}^{2nd}} = \frac{1}{T_{1m} + \tau_m} + \frac{1}{T_{1r}^{2nd}} \quad [3]$$

$$\frac{1}{T_{2r}} = \frac{1}{T_{2r}^{1st}} = \frac{1}{\tau_m} \frac{T_{2m}^{-2} + \tau_m^{-1} T_{2m}^{-1} + \Delta\omega_m^2}{(\tau_m^{-1} + T_{2m}^{-1})^2 + \Delta\omega_m^2} \quad [4]$$

First sphere contribution to <sup>17</sup>O relaxation:

The <sup>17</sup>O longitudinal relaxation rates in Gd(III) solutions are the sum of the contributions of the dipole-dipole and quadrupolar (in the approximation developed by Halle for non-extreme narrowing conditions) mechanisms as expressed by Eq. [6]-[7], where  $\gamma_S$  is the electron and  $\gamma_I$  is the nuclear gyromagnetic ratio ( $\gamma_S = 1.76 \times 10^{11} \text{ rad} \cdot \text{s}^{-1} \cdot \text{T}^{-1}$ ,  $\gamma_I = -3.626 \times 10^7 \text{ rad} \cdot \text{s}^{-1} \cdot \text{T}^{-1}$ ),  $r_{GdO}$  is the effective distance between the electron charge and the <sup>17</sup>O nucleus,  $I$  is the nuclear spin (5/2 for <sup>17</sup>O),  $\chi$  is the quadrupolar coupling constant and  $\eta$  is an asymmetry parameter:

$$\frac{1}{T_{1m}} = \frac{1}{T_{1dd}} + \frac{1}{T_{1q}} \quad [5]$$

$$\frac{1}{T_{1dd}} = \frac{2}{15} \left( \frac{\mu_0}{4\pi} \right)^2 \frac{\hbar^2 \gamma_I^2 \gamma_S^2}{r_{GdO}^6} S(S+1) [3J(\omega_I; \tau_{d1}) + 7J(\omega_S; \tau_{d2})]; \quad J(\omega; \tau) = \frac{\tau}{1 + (\omega\tau)^2} \quad [6]$$

$$\frac{1}{\tau_{d1}} = \frac{1}{\tau_m} + \frac{1}{T_{1e}} + \frac{1}{\tau_{RO}}$$

$$\frac{1}{T_{1q}} = \frac{3\pi^2}{10} \frac{2I+3}{I^2(2I-1)} \chi^2 \left( 1 + \frac{\eta^2}{3} \right) [0.2J_1(\omega_I; \tau_{RO}) + 0.8J_2(\omega_I; \tau_{RO})]; \quad J_n(\omega; \tau) = \frac{\tau}{1 + (n\omega\tau)^2} \quad [7]$$

In the transverse relaxation the scalar contribution,  $1/T_{2sc}$ , is dominating, Eq. [8].  $1/\tau_{s1}$  is the sum of the exchange rate constant and the electron spin relaxation rate.

$$\frac{1}{T_{2m}} \cong \frac{1}{T_{2SC}} = \frac{S(S+1)}{3} \left( \frac{A}{\hbar} \right)^2 \tau_{s1} \quad [8]$$

$$\frac{1}{\tau_{s1}} = \frac{1}{\tau_m} + \frac{1}{T_{1e}} \quad [9]$$

For slowly rotating species with internal degrees of freedom, the spectral density functions  $J$  are described by the Lipari-Szabo approach.<sup>3,4</sup> In this model we distinguish two statistically independent motions; a rapid local motion with a correlation time  $\tau_l$  and a slower global motion with a correlation time  $\tau_g$ . Supposing the global molecular reorientation is isotropic, the relevant spectral density functions are expressed as in Eq. [10]-[13], where the general order parameter  $S^2$  describes the degree of spatial restriction of the local motion. If the local motion is isotropic,  $S^2=0$ ; if the rotational dynamics is only governed by the global motion,  $S^2=1$ .

$$J(\omega; \tau_{di}) = \left( \frac{S^2 \tau_{dig}}{1 + \omega^2 \tau_{dig}^2} + \frac{(1 - S^2) \tau_{di}}{1 + \omega^2 \tau_{di}^2} \right) \quad [10]$$

$$\frac{1}{\tau_{dig}} = \frac{1}{\tau_m} + \frac{1}{\tau_g} + \frac{1}{T_{ie}} \quad ; \quad \frac{1}{\tau_{di}} = \frac{1}{\tau_m} + \frac{1}{\tau^O} + \frac{1}{T_{ie}} \quad ; \quad i=1,2 \quad [11]$$

$$\frac{1}{\tau^O} = \frac{1}{\tau_g} + \frac{1}{\tau_l^O} \quad [12]$$

$$J_n(\omega) = \left( \frac{S^2 \tau_g}{1 + (n\omega\tau_g)^2} + \frac{(1 - S^2) \tau^O}{1 + (n\omega\tau^O)^2} \right) \quad [13]$$

Second sphere contribution to  $^{17}\text{O}$  relaxation:

$$\frac{1}{T_1^{2nd}} \cong \frac{q^{2nd}}{q^{1st}} \frac{1}{T_{1m}^{2nd}} = \frac{q^{2nd}}{q^{1st}} \left( \frac{1}{T_{1dd}^{2nd}} + \frac{1}{T_{1q}^{2nd}} \right) \quad [14]$$

$$\frac{1}{T_{1dd}^{2nd}} = C_{dd}^{2nd,O} \left( \frac{3\tau_{d1}^{2nd,O}}{1 + (\omega_1 \tau_{d1}^{2nd,O})^2} + \frac{7\tau_{d2}^{2nd,O}}{1 + (\omega_s \tau_{d2}^{2nd,O})^2} \right) \quad [15]$$

$$C_{dd}^{2nd,O} = \frac{2}{15} \left( \frac{\mu_0}{4\pi} \right)^2 \frac{\hbar^2 \gamma_{^{17}\text{O}}^2 \gamma_S^2}{(r_{GdO}^{2nd})^6} S(S+1)$$

$$\frac{1}{T_{1q}^{2nd}} = \frac{3\pi^2}{10} \frac{2I+3}{I^2(2I-1)} \chi^2 (1 + \eta^2/3) \left( \frac{0.2\tau^{2nd,O}}{1 + (\omega_1 \tau^{2nd,O})^2} + \frac{0.8\tau^{2nd,O}}{1 + (2\omega_1 \tau^{2nd,O})^2} \right) \quad [16]$$

$$\frac{1}{\tau^{O,2nd}} = \frac{1}{\tau_g} + \frac{1}{\tau_1^O} \cong \frac{1}{\tau_1^O} \quad [17]$$

$$\frac{1}{\tau_{di}^{2nd,O}} = k_{ex}^{2nd} + \frac{1}{\tau^{O,2nd}} + \frac{1}{T_{ie}} \quad [18]$$

### $^1\text{H}$ NMRD:

The measured longitudinal proton relaxation rate,  $R_1^{obs}$  is the sum of a paramagnetic and a diamagnetic contribution as expressed in Eq. [19], where  $r_1$  is the proton relaxivity:

$$R_1^{obs} = R_1^d + R_1^p = R_1^d + r_1 [Gd^{3+}] \quad [19]$$

The relaxivity is here given by the sum of inner sphere, second sphere and outer sphere contributions:

$$r_1 = r_{1is} + r_{1,2nd} + r_{1os} \quad [20]$$

Inner sphere  $^1\text{H}$  relaxation:

The inner sphere term is given in Eq. [21], where  $q^{1st}$  is the number of inner sphere water molecules.<sup>5</sup>

$$r_{1is} = \frac{1}{1000} \times \frac{q^{1st}}{55.55} \times \frac{1}{T_{1m}^H + \tau_m} \quad [21]$$

The longitudinal relaxation rate of inner sphere protons,  $1/T_{1m}^H$  is expressed by Eq. [22], where  $r_{GdH}$  is the effective distance between the electron charge and the  $^1H$  nucleus,  $\omega_I$  is the proton resonance frequency and  $\omega_S$  is the Larmor frequency of the Gd(III) electron spin.

$$\frac{1}{T_{1m}^H} = \frac{2}{15} \left( \frac{\mu_0}{4\pi} \right)^2 \frac{\hbar^2 \gamma_I^2 \gamma_S^2}{r_{GdH}^6} S(S+1) [3J(\omega_I; \tau_{d1}) + 7J(\omega_S; \tau_{d2})] \quad [22]$$

$$J(\omega; \tau_{di}) = \left( \frac{S^2 \tau_{dig}}{1 + \omega^2 \tau_{dig}^2} + \frac{(1 - S^2) \tau_{di}}{1 + \omega^2 \tau_{di}^2} \right); \quad i = 1, 2 \quad [23]$$

$$\frac{1}{\tau_{dig}} = \frac{1}{\tau_m} + \frac{1}{\tau_g} + \frac{1}{T_{ie}}; \quad \frac{1}{\tau_{di}} = \frac{1}{\tau_m} + \frac{1}{\tau^H} + \frac{1}{T_{ie}}; \quad i = 1, 2 \quad [24]$$

$$\frac{1}{\tau^H} = \frac{1}{\tau_g} + \frac{1}{\tau_1^H} \quad [25]$$

The spectral density functions are given by Eq. [23].

Second sphere  $^1H$  relaxation:

$$r_1^{2nd} = \frac{1}{1000} \times \frac{q^{2nd}}{55.55} \times \frac{1}{T_{1dd}^{2nd,H} + \tau_m^{2nd}} \cong \frac{1}{1000} \times \frac{q^{2nd}}{55.55} \times \frac{1}{T_{1dd}^{2nd,H}} \quad [26]$$

$$\frac{1}{T_{1dd}^{2nd,H}} = C_{dd}^{2nd,O} \left( \frac{3\tau_{d1}^{2nd,H}}{1 + (\omega_I \tau_{d1}^{2nd,H})^2} + \frac{7\tau_{d2}^{2nd,H}}{1 + (\omega_S \tau_{d2}^{2nd,H})^2} \right) \quad [27]$$

$$C_{dd}^{2nd,H} = \frac{2}{15} \left( \frac{\mu_0}{4\pi} \right)^2 \frac{\hbar^2 \gamma_I^2 \gamma_S^2}{(r_{GdO}^{2nd})^6} S(S+1) \quad [28]$$

$$\frac{1}{\tau_{di}^{2nd,H}} = k_{ex}^{2nd} + \frac{1}{\tau^H} + \frac{1}{T_{ie}} \quad [29]$$

$$\frac{1}{\tau^H} = \frac{1}{\tau_g} + \frac{1}{\tau_1^H} \quad [30]$$

Outer sphere  $^1H$  relaxation:

The outer-sphere contribution can be described by Eq. [31] where  $N_A$  is the Avogadro constant, and  $J_{os}$  is its associated spectral density function.<sup>6,7</sup>

$$r_{1os} = \frac{32N_A\pi}{405} \left( \frac{\mu_0}{4\pi} \right)^2 \frac{\hbar^2 \gamma_S^2 \gamma_I^2}{a_{GdH} D_{GdH}} S(S+1) [3J_{os}(\omega_I; T_{1e}) + 7J_{os}(\omega_S; T_{2e})] \quad [31]$$

$$J_{os}(\omega, T_{je}) = \text{Re} \left[ \frac{1 + \frac{1}{4} \left( i\omega\tau_{GdH} + \frac{\tau_{GdH}}{T_{je}} \right)^{1/2}}{1 + \left( i\omega\tau_{GdH} + \frac{\tau_{GdH}}{T_{je}} \right)^{1/2} + \frac{4}{9} \left( i\omega\tau_{GdH} + \frac{\tau_{GdH}}{T_{je}} \right) + \frac{1}{9} \left( i\omega\tau_{GdH} + \frac{\tau_{GdH}}{T_{je}} \right)^{3/2}} \right]; \quad j = 1, 2 \quad [32]$$

$$\tau_{GdH} = \frac{a_{GdH}^2}{D_{GdH}} \quad [33]$$

$a_{GdH}$  is the distance of closes approach and  $D_{GdH}$  is the diffusion coefficient for the diffusion of a water proton relative to the Gd(III) complex.

Electron spin relaxation:

The longitudinal and transverse electronic relaxation rates,  $1/T_{1e}$  and  $1/T_{2e}$  are described by Solomon-Bloembergen-Morgan theory modified by Powell (Eqs. [34]-[35]), where  $\tau_V$  is the correlation time for the modulation of the zero-field-splitting interaction.

$$\left(\frac{1}{T_{1e}}\right)^{ZFS} = \frac{1}{25} \Delta^2 \tau_V \{4S(S+1) - 3\} \left( \frac{1}{1 + \omega_S^2 \tau_V^2} + \frac{4}{1 + 4\omega_S^2 \tau_V^2} \right) \quad [34]$$

$$\left(\frac{1}{T_{2e}}\right)^{ZFS} = \Delta^2 \tau_V \left( \frac{5.26}{1 + 0.372\omega_S^2 \tau_V^2} + \frac{7.18}{1 + 1.24\omega_S^2 \tau_V^2} \right) \quad [35]$$

Temperature dependences of water exchange rates and correlation times:

The exchange rates are supposed to follow the Eyring equation. In Eq. [36]  $\Delta S^\ddagger$  and  $\Delta H^\ddagger$  are the entropy and enthalpy of activation for the water exchange process, and  $k_{ex}^{298}$  is the exchange rate at 298.15 K. In Eq. [37]  $\Delta H^{\ddagger 2nd}$  is the enthalpy of activation for the second sphere water exchange process and  $k_{ex}^{2nd,298}$  is the corresponding exchange rate at 298 K.

$$k_{ex} = \frac{1}{\tau_m} = \frac{k_B T}{h} \exp \left\{ \frac{\Delta S^\ddagger}{R} - \frac{\Delta H^\ddagger}{RT} \right\} = \frac{k_{ex}^{298} T}{298.15} \exp \left\{ \frac{\Delta H^\ddagger}{R} \left( \frac{1}{298.15} - \frac{1}{T} \right) \right\} \quad [36]$$

$$k_{ex}^{2nd} = \frac{k_{ex}^{2nd,298}}{298.14} \exp \left\{ \frac{\Delta H^{\ddagger 2nd}}{T} \left( \frac{1}{298.15} - \frac{1}{T} \right) \right\} \quad [37]$$

All correlation times and the diffusion constant are supposed to obey an Arrhenius law:

$$\tau = \tau^{298} \exp \left\{ \frac{E_a}{R} \left( \frac{1}{T} - \frac{1}{298.15} \right) \right\} \quad [38]$$

$$D_{GdH} = D_{GdH}^{298} \exp \left\{ \frac{E_{GdH}}{R} \left( \frac{1}{298.15} - \frac{1}{T} \right) \right\} \quad [39]$$

**Table S1:** Proton relaxivities ( $r_1 / \text{mM}^{-1}\text{s}^{-1}$ ) of G5-(Gd(DDTPA))<sub>63</sub>,  $c(\text{Gd}^{\text{III}})=5.3 \text{ mM}$ ,  $\text{pH}=6.25$ , at variable temperature.

| $\nu (^1\text{H})/\text{MHz}$ | 5°C  | 15°C | 25°C | 37°C | 50°C |
|-------------------------------|------|------|------|------|------|
| 0.010                         | 22.6 | 23.2 | 22.5 | 20.2 | 18.1 |
| 0.014                         | 22.7 | 23.4 | 22.3 | 20.3 | 18.1 |
| 0.021                         | 22.4 | 23.4 | 22.5 | 20.1 | 18.0 |
| 0.030                         | 22.4 | 23.4 | 22.4 | 20.2 | 18.1 |
| 0.043                         | 22.5 | 23.4 | 22.4 | 20.3 | 18.1 |
| 0.062                         | 22.5 | 23.3 | 22.5 | 20.3 | 18.0 |
| 0.089                         | 22.5 | 23.3 | 22.5 | 20.1 | 18.0 |
| 0.127                         | 22.5 | 23.3 | 22.3 | 20.1 | 17.9 |
| 0.183                         | 22.4 | 23.2 | 22.3 | 20.1 | 17.9 |
| 0.264                         | 22.3 | 23.2 | 22.2 | 20.1 | 17.8 |
| 0.379                         | 22.0 | 22.8 | 21.9 | 19.8 | 17.5 |
| 0.546                         | 21.8 | 22.4 | 21.6 | 19.4 | 17.2 |
| 0.784                         | 21.1 | 21.8 | 21.0 | 18.8 | 16.7 |
| 1.13                          | 20.6 | 21.3 | 20.4 | 18.2 | 16.2 |
| 1.62                          | 19.9 | 20.5 | 19.6 | 17.7 | 15.6 |
| 2.34                          | 19.1 | 19.9 | 18.8 | 16.7 | 15.0 |
| 3.36                          | 18.5 | 19.0 | 18.0 | 16.2 | 14.4 |
| 4.83                          | 17.9 | 18.8 | 17.3 | 15.6 | 13.7 |
| 6.95                          | 17.5 | 19.0 | 17.2 | 15.5 | 13.4 |
| 10.0                          | 21.4 | 22.2 | 21.5 | 18.8 | 16.4 |
| 11.5                          | 22.8 | -    | 23.0 | 20.0 | 17.7 |
| 12.0                          | -    | 23.9 | -    | -    | -    |
| 13.2                          | 23.8 | -    | 24.7 | 21.6 | 18.9 |
| 13.6                          | -    | 24.9 | -    | -    | -    |
| 15.2                          | 25.1 | -    | 26.5 | 23.5 | 20.3 |
| 15.5                          | -    | 26.4 | -    | -    | -    |
| 17.4                          | 26.0 | -    | 28.3 | 25.2 | 22.2 |
| 17.6                          | -    | 27.6 | -    | -    | -    |
| 20                            | 27.6 | 28.8 | 30.4 | 26.8 | 23.5 |
| 30                            | 26.0 | 29.4 | 30.6 | 28.5 | 24.1 |
| 40                            | 24.7 | 27.9 | 28.9 | 27.3 | 23.5 |
| 60                            | 20.6 | 22.4 | 23.0 | 22.0 | 19.8 |
| 100                           | 14.8 | 14.8 | 14.7 | 14.1 | 13.2 |
| 200                           | 9.10 | 8.74 | 8.34 | 7.83 | 7.55 |

**Table S2:** Proton relaxivities ( $r_1 / \text{mM}^{-1}\text{s}^{-1}$ ) of  $[\text{Gd}(\text{DTTAP-bz-NH}_2)(\text{H}_2\text{O})]^{2-}$ ,  $c(\text{Gd}^{\text{III}})=4.2 \text{ mM}$ ,  $\text{pH}=6.75$ , at variable temperature.

| $\nu (^1\text{H})/\text{MHz}$ | 5°C  | 25°C | 37°C | 50°C |
|-------------------------------|------|------|------|------|
| 0.010                         | 14.0 | 9.58 | 8.02 | 6.26 |
| 0.014                         | 14.0 | 9.56 | 8.07 | 6.26 |
| 0.021                         | 14.0 | 9.63 | 7.99 | 6.30 |
| 0.030                         | 13.8 | 9.61 | 7.93 | 6.26 |
| 0.043                         | 13.9 | 9.64 | 8.15 | 6.25 |
| 0.062                         | 13.9 | 9.61 | 8.06 | 6.22 |
| 0.089                         | 14.0 | 9.56 | 8.04 | 6.22 |
| 0.127                         | 14.0 | 9.59 | 8.05 | 6.25 |
| 0.183                         | 13.9 | 9.59 | 8.04 | 6.22 |
| 0.264                         | 14.0 | 9.58 | 8.07 | 6.25 |
| 0.379                         | 13.9 | 9.53 | 8.11 | 6.25 |
| 0.546                         | 13.5 | 9.56 | 7.98 | 6.18 |
| 0.784                         | 13.7 | 9.48 | 7.99 | 6.17 |
| 1.13                          | 13.5 | 9.37 | 7.85 | 6.15 |
| 1.62                          | 13.2 | 9.27 | 7.86 | 6.07 |
| 2.34                          | 12.7 | 9.11 | 7.68 | 6.00 |
| 3.36                          | 12.3 | 8.76 | 7.49 | 5.87 |
| 4.83                          | 11.6 | 8.27 | 7.20 | 5.64 |
| 6.95                          | 10.9 | 7.81 | 6.72 | 5.36 |
| 10.0                          | 11.1 | 7.27 | 5.97 | 4.80 |
| 10.0                          | 11.0 | -    | -    | -    |
| 11.6                          | 10.9 | 7.08 | 5.68 | 4.55 |
| 13.4                          | 10.8 | 6.87 | 5.39 | 4.34 |
| 15.5                          | 10.8 | 6.62 | 5.20 | 4.09 |
| 18                            | 10.8 | 6.44 | 4.97 | 3.93 |
| 20                            | 10.7 | 6.34 | 5.02 | 4.08 |
| 30                            | 10.6 | 6.34 | 4.75 | 3.76 |
| 40                            | 10.6 | 6.22 | 4.60 | 3.61 |
| 60                            | 10.6 | 6.23 | 4.51 | 3.46 |
| 100                           | 10.3 | 6.08 | 4.43 | 3.42 |
| 200                           | 9.48 | 5.88 | 4.26 | 3.32 |
| 400                           | 7.92 | 5.49 | 4.19 | 3.24 |

**Table S3:** Proton relaxivities ( $r_1 / \text{mM}^{-1}\text{s}^{-1}$ ) of  $[\text{Gd}(\text{DTTAP-bz-NO}_2)(\text{H}_2\text{O})]^{2-}$ ,  $c(\text{Gd}^{\text{III}})=3.8 \text{ mM}$ ,  $\text{pH}=6.59$ , at variable temperature.

| $\nu (^1\text{H})/\text{MHz}$ | 5°C  | 25°C | 37°C | 50°C |
|-------------------------------|------|------|------|------|
| 0.010                         | 14.2 | 10.1 | 8.22 | 6.82 |
| 0.014                         | 14.2 | 10.1 | 8.24 | 6.84 |
| 0.021                         | 14.3 | 10.1 | 8.24 | 6.81 |
| 0.030                         | 14.3 | 10.1 | 8.21 | 6.84 |
| 0.043                         | 14.2 | 10.1 | 8.22 | 6.80 |
| 0.062                         | 14.2 | 10.1 | 8.24 | 6.81 |
| 0.089                         | 14.2 | 10.1 | 8.22 | 6.80 |
| 0.127                         | 14.2 | 10.1 | 8.21 | 6.81 |
| 0.183                         | 14.2 | 10.1 | 8.19 | 6.79 |
| 0.264                         | 14.1 | 10.1 | 8.18 | 6.79 |
| 0.379                         | 14.1 | 10.1 | 8.20 | 6.78 |
| 0.546                         | 14.0 | 10.1 | 8.15 | 6.74 |
| 0.784                         | 13.8 | 9.99 | 8.13 | 6.75 |
| 1.13                          | 13.6 | 9.81 | 8.04 | 6.68 |
| 1.623                         | 13.3 | 9.67 | 7.96 | 6.59 |
| 2.34                          | 12.8 | 9.43 | 7.72 | 6.48 |
| 3.36                          | 12.4 | 9.07 | 7.48 | 6.26 |
| 4.83                          | 11.6 | 8.58 | 7.08 | 5.94 |
| 6.95                          | 11.0 | 7.77 | 6.54 | 5.49 |
| 10.0                          | 10.9 | 7.58 | 6.07 | 5.16 |
| 11.5                          | 10.7 | 7.27 | 5.84 | 4.93 |
| 13.2                          | 10.8 | 7.04 | 5.61 | 4.68 |
| 15.2                          | 10.6 | 6.87 | 5.34 | 4.45 |
| 17.4                          | 10.6 | 6.72 | 5.16 | 4.31 |
| 20                            | 10.7 | 6.76 | 5.24 | 4.34 |
| 30                            | 10.2 | 6.34 | 4.74 | 3.76 |
| 40                            | 10.2 | 6.27 | 4.60 | 3.61 |
| 60                            | 10.3 | 6.23 | 4.51 | 3.47 |
| 100                           | 9.90 | 6.01 | 4.45 | 3.39 |
| 200                           | 9.36 | 5.84 | 4.32 | 3.32 |
| 400                           | 8.23 | 5.46 | 4.23 | 3.23 |



**Table S4:** Variable temperature reduced transverse and longitudinal  $^{17}\text{O}$  relaxation rates of G5-(Gd(DTTAP))<sub>63</sub>, c(Gd<sup>III</sup>)=39 mM, pH=5.69,  $P_m=7.95\cdot 10^{-4}$  at 9.4 T. Reference was G5-(Y(DTTAP))<sub>63</sub>, c(Y<sup>III</sup>)=34 mM, pH=5.83.

| t / °C | T / K | 1000/T / K <sup>-1</sup> | $T_1$ (Gd)/s | $T_1$ (Y)/s | $T_2$ (Gd)/s | $T_2$ (Y)/s | ln(1/ $T_{1r}$ ) | ln(1/ $T_{2r}$ ) |
|--------|-------|--------------------------|--------------|-------------|--------------|-------------|------------------|------------------|
| 5.4    | 278.6 | 3.59                     | 2.41E-03     | 2.80E-03    | 9.15E-04     | 2.00E-03    | 11.19            | 13.52            |
| 10.7   | 283.9 | 3.52                     | 2.91E-03     | 3.39E-03    | 8.38E-04     | 2.47E-03    | 11.02            | 13.81            |
| 18.3   | 291.5 | 3.43                     | 3.47E-03     | 4.31E-03    | 6.80E-04     | 3.24E-03    | 11.16            | 14.20            |
| 23.6   | 296.8 | 3.37                     | 3.93E-03     | 5.02E-03    | 6.87E-04     | 3.92E-03    | 11.15            | 14.23            |
| 30.3   | 303.5 | 3.30                     | 4.59E-03     | 6.11E-03    | 7.02E-04     | 5.00E-03    | 11.13            | 14.25            |
| 40.2   | 313.4 | 3.19                     | 5.60E-03     | 7.83E-03    | 9.25E-04     | 6.77E-03    | 11.07            | 13.98            |
| 49.2   | 322.4 | 3.10                     | 6.73E-03     | 9.62E-03    | 1.16E-03     | 8.62E-03    | 10.93            | 13.75            |
| 59.7   | 332.9 | 3.00                     | 7.99E-03     | 1.19E-02    | 1.66E-03     | 1.10E-02    | 10.86            | 13.38            |
| 70.5   | 343.7 | 2.91                     | 9.62E-03     | 1.47E-02    | 2.49E-03     | 1.40E-02    | 10.72            | 12.94            |
| 81.3   | 354.5 | 2.82                     | 1.17E-02     | 1.78E-02    | 3.76E-03     | 1.71E-02    | 10.51            | 12.47            |

**Table S5:** Variable temperature reduced transverse and longitudinal  $^{17}\text{O}$  relaxation rates of G5-(Gd(DTTAP))<sub>63</sub>, c(Gd<sup>III</sup>)=39 mM, pH=5.69,  $P_m=7.95\cdot 10^{-4}$  at 4.7 T. Reference was G5-(Y(DTTAP))<sub>63</sub>, c(Y<sup>III</sup>)=34 mM, pH=5.83.

| t / °C | T / K | 1000/T / K <sup>-1</sup> | $T_1$ (Gd)/s | $T_1$ (Y)/s | $T_2$ (Gd)/s | $T_2$ (Y)/s | ln(1/ $T_{1r}$ ) | ln(1/ $T_{2r}$ ) |
|--------|-------|--------------------------|--------------|-------------|--------------|-------------|------------------|------------------|
| 6.0    | 279.2 | 3.58                     | 2.05E-03     | 2.68E-03    | 8.98E-04     | 1.93E-03    | 11.89            | 13.53            |
| 10.3   | 283.5 | 3.53                     | 2.31E-03     | 3.14E-03    | 9.12E-04     | 2.30E-03    | 11.88            | 13.63            |
| 14.3   | 287.5 | 3.48                     | 2.48E-03     | 3.52E-03    | 7.81E-04     | 2.67E-03    | 11.92            | 13.95            |
| 18.8   | 292.0 | 3.43                     | 2.74E-03     | 4.11E-03    | 8.41E-04     | 3.13E-03    | 11.94            | 13.91            |
| 24.1   | 297.3 | 3.36                     | 3.15E-03     | 4.88E-03    | 8.52E-04     | 3.83E-03    | 11.86            | 13.95            |
| 29.6   | 302.8 | 3.30                     | 3.57E-03     | 5.64E-03    | 8.47E-04     | 4.58E-03    | 11.77            | 14.01            |
| 37.2   | 310.4 | 3.22                     | 4.23E-03     | 6.94E-03    | 1.06E-03     | 5.90E-03    | 11.66            | 13.78            |
| 47.9   | 321.1 | 3.11                     | 5.27E-03     | 8.86E-03    | 1.27E-03     | 7.90E-03    | 11.48            | 13.63            |
| 58.7   | 331.9 | 3.01                     | 6.52E-03     | 1.14E-02    | 1.81E-03     | 1.05E-02    | 11.32            | 13.26            |
| 71.1   | 344.3 | 2.90                     | 8.58E-03     | 1.45E-02    | 2.72E-03     | 1.35E-02    | 10.99            | 12.82            |
| 81.8   | 355.0 | 2.82                     | 1.09E-02     | 1.74E-02    | 3.86E-03     | 1.68E-02    | 10.66            | 12.43            |

**Table S6:** Variable temperature reduced transverse and longitudinal  $^{17}\text{O}$  relaxation rates of  $[\text{Gd}(\text{DTTAP-bz-NH}_2)(\text{H}_2\text{O})]^{2-}$ ,  $c(\text{Gd}^{\text{III}})=46 \text{ mM}$ ,  $\text{pH}=5.51$ ,  $P_m=8.19 \cdot 10^{-4}$  at 9.4 T. Reference was acidified  $\text{H}_2\text{O}$ ,  $\text{pH}=3.3$ .

| $t / ^\circ\text{C}$ | $T / \text{K}$ | $1000/T / \text{K}^{-1}$ | $T_1 (\text{Gd})/\text{s}$ | $T_1 (\text{H}_2\text{O})/\text{s}$ | $T_2(\text{Gd})/\text{s}$ | $T_2(\text{H}_2\text{O})/\text{s}$ | $\ln(1/T_{1r})$ | $\ln(1/T_{2r})$ |
|----------------------|----------------|--------------------------|----------------------------|-------------------------------------|---------------------------|------------------------------------|-----------------|-----------------|
| 5.8                  | 279.0          | 3.58                     | 3.28E-03                   | 3.99E-03                            | 7.85E-04                  | 4.02E-03                           | 11.09           | 14.04           |
| 12.5                 | 285.7          | 3.50                     | 4.16E-03                   | 5.02E-03                            | 6.68E-04                  | 5.00E-03                           | 10.82           | 14.27           |
| 19.6                 | 292.8          | 3.42                     | 5.15E-03                   | 6.17E-03                            | 6.47E-04                  | 6.26E-03                           | 10.58           | 14.34           |
| 29.1                 | 302.3          | 3.31                     | 6.63E-03                   | 7.95E-03                            | 7.12E-04                  | 7.95E-03                           | 10.33           | 14.26           |
| 39.2                 | 312.4          | 3.20                     | 8.60E-03                   | 1.02E-02                            | 9.70E-04                  | 1.03E-02                           | 9.99            | 13.95           |
| 45.9                 | 319.1          | 3.13                     | 9.95E-03                   | 1.16E-02                            | 1.29E-03                  | 1.16E-02                           | 9.76            | 13.65           |
| 55.4                 | 328.6          | 3.04                     | 1.20E-02                   | 1.39E-02                            | 1.77E-03                  | 1.39E-02                           | 9.58            | 13.31           |
| 59.9                 | 333.1          | 3.00                     | 1.30E-02                   | 1.51E-02                            | 2.14E-03                  | 1.50E-02                           | 9.49            | 13.10           |
| 64.5                 | 337.7          | 2.96                     | 1.40E-02                   | 1.64E-02                            | 2.56E-03                  | 1.63E-02                           | 9.47            | 12.90           |
| 75.4                 | 348.6          | 2.87                     | 1.70E-02                   | 1.95E-02                            | 4.10E-03                  | 1.94E-02                           | 9.12            | 12.37           |
| 85.7                 | 358.9          | 2.79                     | 1.96E-02                   | 2.25E-02                            | 5.92E-03                  | 2.25E-02                           | 8.99            | 11.93           |

**Table S7:** Variable temperature reduced transverse and longitudinal  $^{17}\text{O}$  relaxation rates of  $[\text{Gd}(\text{DTTAP-bz-NO}_2)(\text{H}_2\text{O})]^{2-}$ ,  $c(\text{Gd}^{\text{III}})=32 \text{ mM}$ ,  $\text{pH}=5.91$ ,  $P_m=5.73 \cdot 10^{-4}$  at 9.4 T. Reference was acidified  $\text{H}_2\text{O}$ ,  $\text{pH}=3.3$ .

| $t / ^\circ\text{C}$ | $T / \text{K}$ | $1000/T / \text{K}^{-1}$ | $T_1 (\text{Gd})/\text{s}$ | $T_1 (\text{H}_2\text{O})/\text{s}$ | $T_2(\text{Gd})/\text{s}$ | $T_2(\text{H}_2\text{O})/\text{s}$ | $\ln(1/T_{1r})$ | $\ln(1/T_{2r})$ |
|----------------------|----------------|--------------------------|----------------------------|-------------------------------------|---------------------------|------------------------------------|-----------------|-----------------|
| 5.8                  | 279.0          | 3.58                     | 3.43E-03                   | 3.99E-03                            | 1.07E-03                  | 4.02E-03                           | 11.16           | 13.99           |
| 12.5                 | 285.7          | 3.50                     | 4.39E-03                   | 5.02E-03                            | 9.24E-04                  | 5.00E-03                           | 10.81           | 14.25           |
| 19.6                 | 292.8          | 3.42                     | 5.39E-03                   | 6.17E-03                            | 8.37E-04                  | 6.26E-03                           | 10.63           | 14.41           |
| 29.1                 | 302.3          | 3.31                     | 6.93E-03                   | 7.95E-03                            | 9.13E-04                  | 7.95E-03                           | 10.38           | 14.34           |
| 39.2                 | 312.4          | 3.20                     | 8.95E-03                   | 1.02E-02                            | 1.20E-03                  | 1.03E-02                           | 10.05           | 14.07           |
| 45.9                 | 319.1          | 3.13                     | 1.02E-02                   | 1.16E-02                            | 1.50E-03                  | 1.16E-02                           | 9.93            | 13.83           |
| 55.4                 | 328.6          | 3.04                     | 1.24E-02                   | 1.39E-02                            | 2.09E-03                  | 1.39E-02                           | 9.63            | 13.47           |
| 59.9                 | 333.1          | 3.00                     | 1.35E-02                   | 1.51E-02                            | 2.45E-03                  | 1.50E-02                           | 9.53            | 13.30           |
| 64.5                 | 337.7          | 2.96                     | 1.46E-02                   | 1.64E-02                            | 3.02E-03                  | 1.63E-02                           | 9.47            | 13.06           |
| 75.4                 | 348.6          | 2.87                     | 1.75E-02                   | 1.95E-02                            | 4.63E-03                  | 1.94E-02                           | 9.20            | 12.57           |
| 85.7                 | 358.9          | 2.79                     | 2.04E-02                   | 2.25E-02                            | 6.66E-03                  | 2.25E-02                           | 9.01            | 12.13           |

**Table S8.** Calculation of the number of chelating groups per dendrimer.

|                                                                                                                                         |                                                                                                               |
|-----------------------------------------------------------------------------------------------------------------------------------------|---------------------------------------------------------------------------------------------------------------|
|                                                                                                                                         | G5-(Gd(DTTAP)) <sub>63</sub>                                                                                  |
| n = number of mols of chelate per gram of product obtained from complexometric titration                                                | 9.89×10 <sup>-4</sup>                                                                                         |
| Total percentage of C obtained from elemental analysis                                                                                  | 48.9                                                                                                          |
| Percentage of carbon in the chelate (DTTAP-bz-NCS = C <sub>21</sub> H <sub>29</sub> N <sub>4</sub> O <sub>10</sub> S) calculated from n | 24.9                                                                                                          |
| Percentage of carbon in PAMAM skeleton                                                                                                  | 48.9-24.9 = 24.0                                                                                              |
| Formula of PAMAM skeleton                                                                                                               | G5-(NH <sub>2</sub> ) <sub>128</sub><br>C <sub>1262</sub> H <sub>2528</sub> N <sub>506</sub> O <sub>252</sub> |
| <b><i>x = number of chelate bound on the dendrimer</i></b>                                                                              | <b>63</b>                                                                                                     |
| Percentage of substituted amino groups                                                                                                  | 49%                                                                                                           |
| Total percentage of N calculated by using <i>x</i>                                                                                      | 16.6                                                                                                          |
| Total percentage of N obtained by elemental analysis                                                                                    | 17.3                                                                                                          |
| Total percentage of S calculated by using <i>x</i>                                                                                      | 3.1                                                                                                           |
| Total percentage of S obtained by elemental analysis                                                                                    | 2.8                                                                                                           |
| Total percentage of P calculated by using <i>x</i>                                                                                      | 3.0                                                                                                           |
| Total percentage of P obtained by elemental analysis                                                                                    | 2.7                                                                                                           |

**Figure S1.** Variable temperature reduced <sup>17</sup>O chemical shifts of [Gd(DTTAP-bz-NO<sub>2</sub>)(H<sub>2</sub>O)]<sup>2-</sup>, c(Gd<sup>III</sup>)=32 mM, pH=5.91, P<sub>m</sub>=5.73·10<sup>-4</sup> at 9.4 T. Reference was acidified H<sub>2</sub>O, pH=3.3.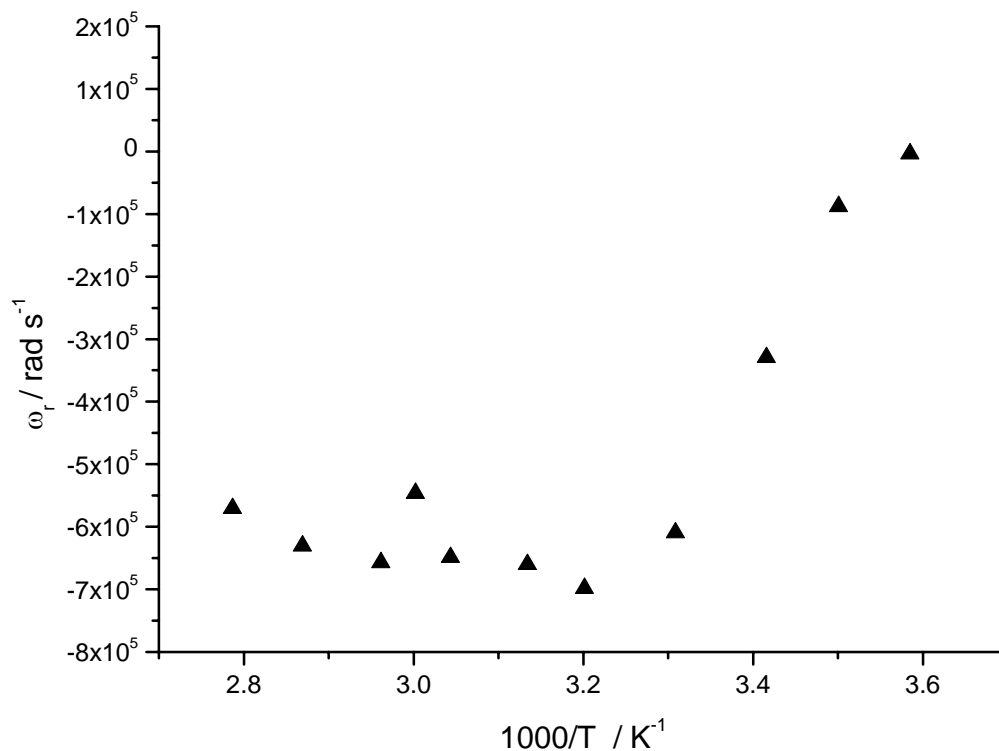

**Figure S2.** Variable temperature reduced  $^{17}\text{O}$  chemical shifts of  $[\text{Gd}(\text{DTTAP-bz-NH}_2)(\text{H}_2\text{O})]^{2-}$ ,  $c(\text{Gd}^{\text{III}})=46 \text{ mM}$ ,  $\text{pH}=5.51$ ,  $P_m=8.19\cdot 10^{-4}$  at 9.4 T. Reference was acidified  $\text{H}_2\text{O}$ ,  $\text{pH}=3.3$ .

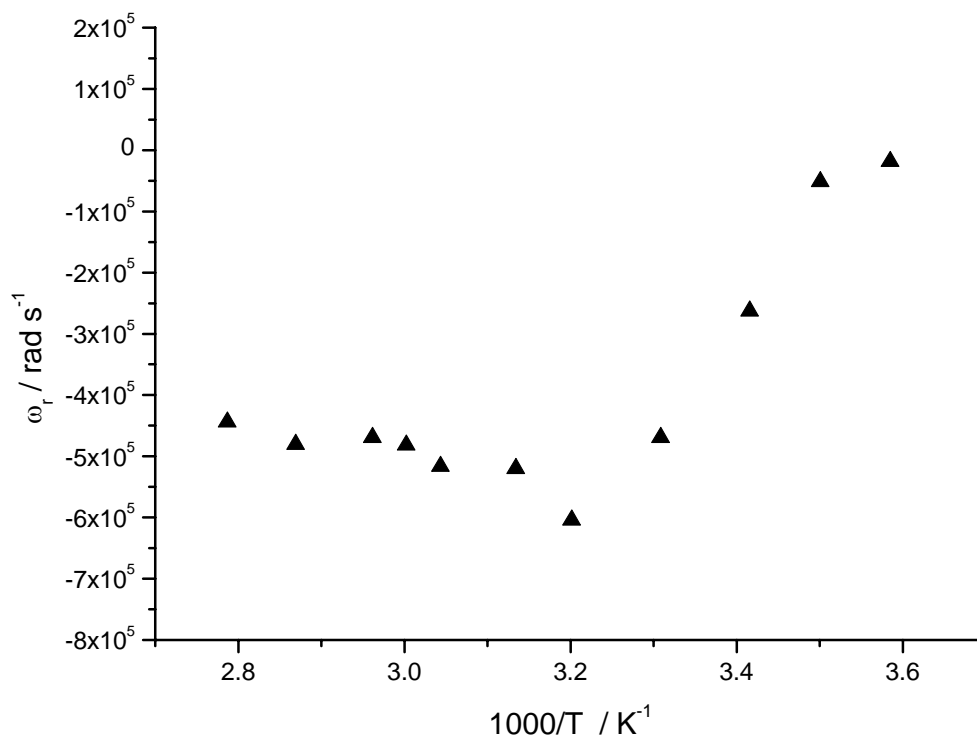

**Figure S3.** Variable temperature reduced  $^{17}\text{O}$  chemical shifts of  $\text{G5-(Gd(DTTAP))}_{63}$ ,  $c(\text{Gd}^{\text{III}})=39 \text{ mM}$ ,  $\text{pH}=5.69$ ,  $P_m=7.95\cdot 10^{-4}$  at 4.7 T ( $\circ$ ) and 9.4 T ( $\blacktriangle$ ). Reference was  $\text{G5-(Y(DTTAP))}_{63}$ ,  $c(\text{Y}^{\text{III}})=34 \text{ mM}$ ,  $\text{pH}=5.83$ .

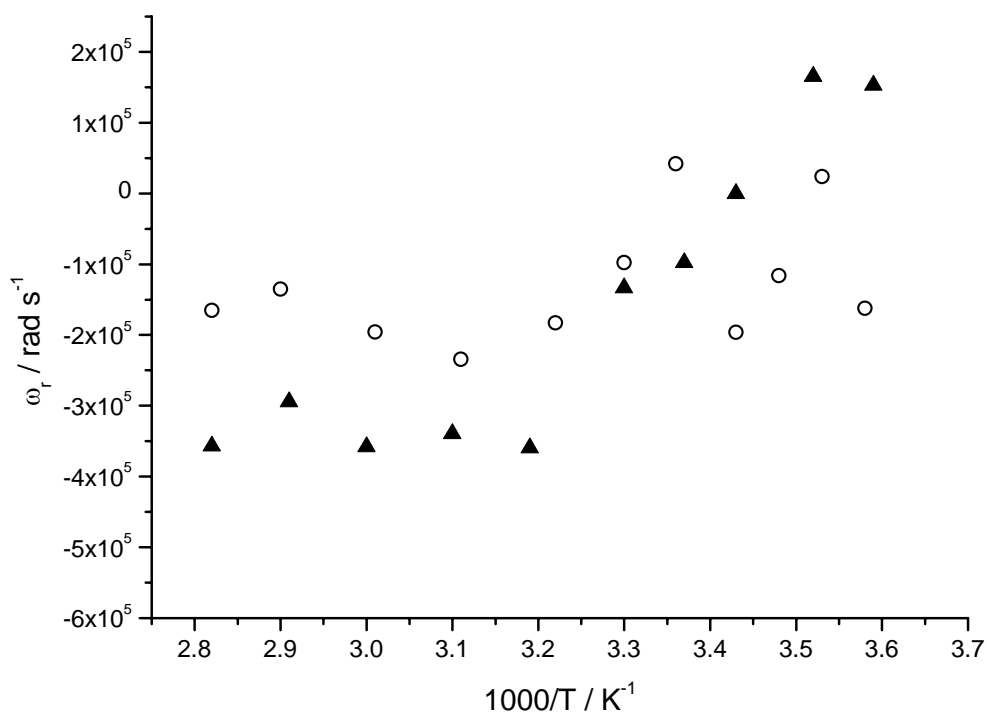

**Table S9.** Fitted parameters of G5-(Gd(DTTAP))<sub>63</sub>. The underlined parameters were fixed during the fitting.

| Parameter                                                 | G5-(Gd(DTTAP)) <sub>63</sub> |
|-----------------------------------------------------------|------------------------------|
| $k_{\text{ex}}^{298}$ [ $10^6 \text{ s}^{-1}$ ]           | 5.0±0.2                      |
| $\Delta H^\ddagger$ [ $\text{kJ mol}^{-1}$ ]              | 56.2±1.0                     |
| $\Delta S^\ddagger$ [ $\text{J mol}^{-1}\text{K}^{-1}$ ]  | +71.9±3                      |
| $A/\hbar$ [ $10^6 \text{ rad s}^{-1}$ ]                   | <u>-3.8</u>                  |
| $\tau_{\text{gO}}^{298}$ [ps]                             | 4417±340                     |
| $E_{\text{gO}}$ [ $\text{kJ mol}^{-1}$ ]                  | 21±2                         |
| $\tau_{\text{IO}}^{298}$ [ps]                             | 71±3                         |
| $E_{\text{IO}}$ [ $\text{kJ mol}^{-1}$ ]                  | 21±2                         |
| $S^2$                                                     | 0.28±0.01                    |
| $\tau_{\text{V}}^{298}$ [ps]                              | 21±2                         |
| $E_{\text{V}}$ [ $\text{kJ mol}^{-1}$ ]                   | 5.5±5.4                      |
| $\Delta^2$ [ $10^{20} \text{ s}^{-2}$ ]                   | 0.62±0.11                    |
| $\delta g_{\text{L}}^2$ [ $10^{-2}$ ]                     | 1.7±0.1                      |
| $r_{\text{GdO}}$ [ $\text{\AA}$ ]                         | <u>2.5</u>                   |
| $r_{\text{GdHouter}}$ [ $\text{\AA}$ ]                    | <u>3.5</u>                   |
| $\chi(1+\eta^2/3)^{1/2}$ [MHz]                            | <u>7.58</u>                  |
| $q$                                                       | <u>1</u>                     |
| $q_{2\text{nd}}$                                          | <u>2</u>                     |
| $\tau_{\text{M}}^{298}$ [ps]                              | <u>50</u>                    |
| $\Delta H_{2\text{nd}}^\ddagger$ [ $\text{kJ mol}^{-1}$ ] | <u>35.0</u>                  |
| $r_{\text{GdH}}^{2\text{nd}}$ [ $\text{\AA}$ ]            | <u>3.5</u>                   |
| $r_{\text{GdO}}^{2\text{nd}}$ [ $\text{\AA}$ ]            | <u>4.1</u>                   |

**Table S10.** Fitted parameters of  $[\text{Gd}(\text{DTTAP-bz-NO}_2)(\text{H}_2\text{O})]^{2-}$  and  $[\text{Gd}(\text{DTTAP-bz-NH}_2)(\text{H}_2\text{O})]^{2-}$ . The underlined parameters were fixed during the fitting.

| Parameter                                                        | $[\text{Gd}(\text{DTTAP-bz-NH}_2)(\text{H}_2\text{O})]^{2-}$ | $[\text{Gd}(\text{DTTAP-bz-NO}_2)(\text{H}_2\text{O})]^{2-}$ |
|------------------------------------------------------------------|--------------------------------------------------------------|--------------------------------------------------------------|
| $k_{\text{ex}}^{298}$ [ $10^6 \text{ s}^{-1}$ ]                  | 8.9±1.3                                                      | 8.3±0.6                                                      |
| $\Delta H^\ddagger$ [ $\text{kJ mol}^{-1}$ ]                     | 48.1±3                                                       | 48.5±2                                                       |
| $\Delta S^\ddagger$ [ $\text{J mol}^{-1}\text{K}^{-1}$ ]         | +49.8±10                                                     | +50.3±8                                                      |
| $A/\hbar$ [ $10^6 \text{ rad s}^{-1}$ ]                          | <u>-3.8</u>                                                  | <u>-3.8</u>                                                  |
| $\tau_{\text{RO}}^{298}$ [ps]                                    | 116±2                                                        | 117±10                                                       |
| $E_{\text{R}}$ [ $\text{kJ mol}^{-1}$ ]                          | 20.5±0.8                                                     | 18±1                                                         |
| $\tau_{\text{V}}^{298}$ [ps]                                     | 28.2±0.5                                                     | 26.3±0.4                                                     |
| $E_{\text{V}}$ [ $\text{kJ mol}^{-1}$ ]                          | <u>1</u>                                                     | <u>1</u>                                                     |
| $\Delta^2$ [ $10^{20} \text{ s}^{-2}$ ]                          | 0.403±0.003                                                  | 0.40±0.01                                                    |
| $D_{\text{GdH}}^{298}$ [ $10^{-10} \text{ m}^2 \text{ s}^{-1}$ ] | 25±2                                                         | 25±2                                                         |
| $E_{\text{DGdH}}$ [ $\text{kJ mol}^{-1}$ ]                       | 30±1                                                         | 30±1                                                         |
| $\delta g_{\text{L}}^2$ [ $10^{-2}$ ]                            | 3.3±0.6                                                      | 2.8±0.5                                                      |
| $\tau_{\text{RH}}^{298} / \tau_{\text{RO}}^{298}$                | 0.81±0.04                                                    | 0.85±0.08                                                    |
| $r_{\text{GdO}}$ [ $\text{\AA}$ ]                                | <u>2.5</u>                                                   | <u>2.5</u>                                                   |
| $r_{\text{GdH}}$ [ $\text{\AA}$ ]                                | <u>3.1</u>                                                   | <u>3.1</u>                                                   |
| $r_{\text{GdHouter}}$ [ $\text{\AA}$ ]                           | <u>3.5</u>                                                   | <u>3.5</u>                                                   |
| $\lambda(1+\eta^2/3)^{1/2}$ [MHz]                                | <u>7.58</u>                                                  | <u>7.58</u>                                                  |
| q                                                                | <u>1</u>                                                     | <u>1</u>                                                     |
| q <sub>2nd</sub>                                                 | <u>2</u>                                                     | <u>2</u>                                                     |
| $\tau_{\text{M}}^{298}$ [ps]                                     | <u>50</u>                                                    | <u>50</u>                                                    |
| $\Delta H_{2\text{nd}}^\ddagger$ [ $\text{kJ mol}^{-1}$ ]        | <u>35.0</u>                                                  | <u>35.0</u>                                                  |
| $r_{\text{GdH}}^{2\text{nd}}$ [ $\text{\AA}$ ]                   | <u>3.5</u>                                                   | <u>3.5</u>                                                   |
| $r_{\text{GdO}}^{2\text{nd}}$ [ $\text{\AA}$ ]                   | <u>4.1</u>                                                   | <u>4.1</u>                                                   |

## References for equations.

- <sup>1</sup> T. J. Swift, R. E. Connick, *J. Chem. Phys.*, 1962, **37**, 307.
- <sup>2</sup> J. R. Zimmermann, W. E. Brittin, *J. Phys. Chem.*, 1957, **61**, 1328.
- <sup>3</sup> G. Lipari, S. Szabó, *J. Am. Chem. Soc.*, 1982, **104**, 4546.
- <sup>4</sup> G. Lipari, S. Szabó, *J. Am. Chem. Soc.*, 1982, **104**, 4559.
- <sup>5</sup> Z. Luz, S. Meiboom, *J. Chem. Phys.*, 1964, **40**, 2686.
- <sup>6</sup> J. H. Freed, *J. Chem. Phys.*, 1978, **68**, 4034.
- <sup>7</sup> S. H. Koenig, R. D. Brown III, *Prog. Nucl. Magn. Reson. Spectrosc.*, 1991, **22**, 487.
